# Supplementary material for: Simulations Meet Experiment to Reveal New Insights into DNA Intrinsic Mechanics
Source: PubMed Central journal article supplement (PMC4689557; doi:10.1371/journal.pcbi.1004631), 2015-12-10
Supplement: pcbi.1004631.s003.pdf [file pcbi.1004631.s003.pdf]

**S3 Fig.** Convergence of BII percentages in 1 $\mu$ s MD simulations of Oligo 4.

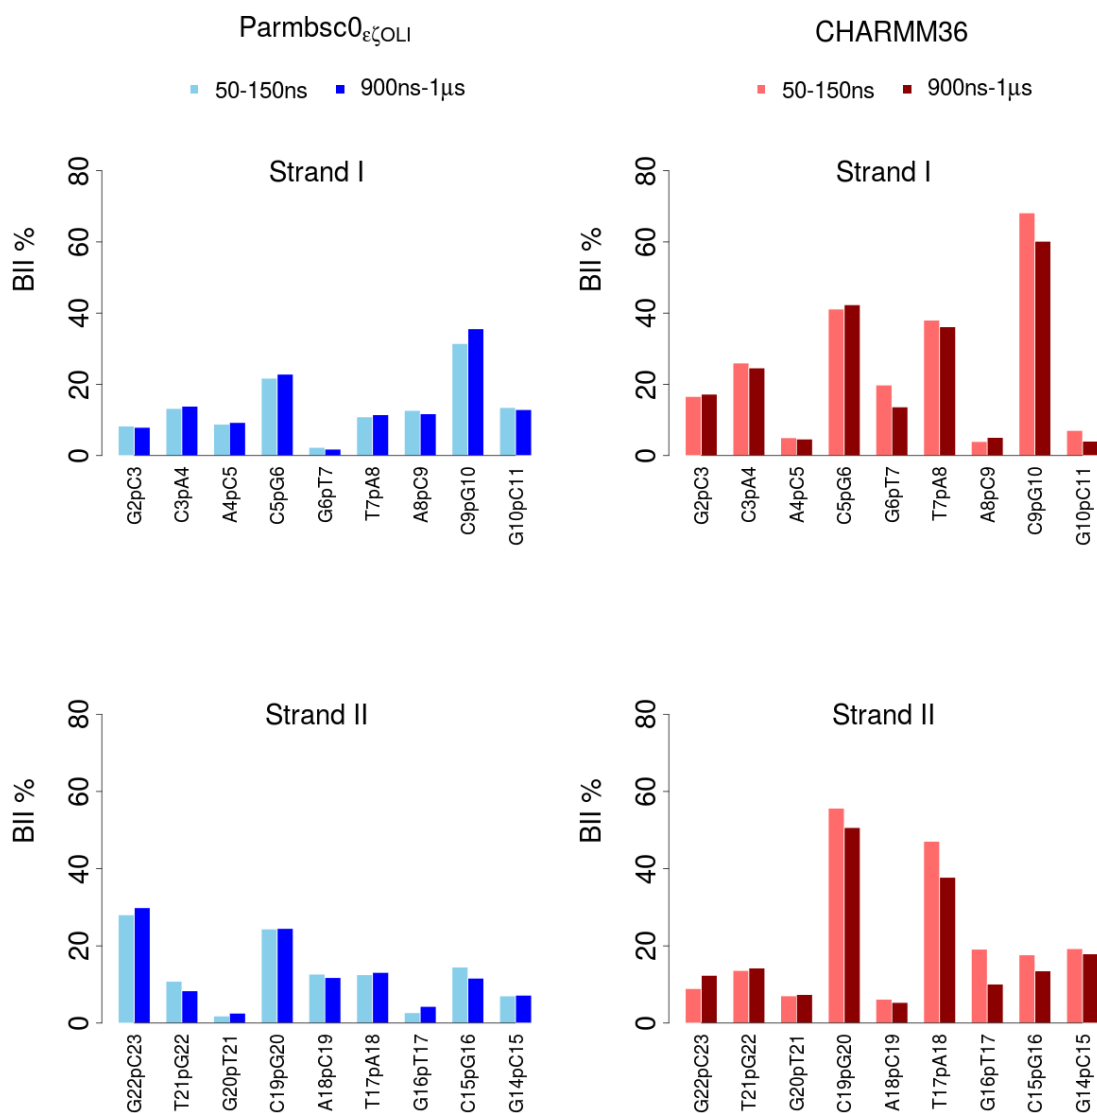

BII percentages (BII%) of the dinucleotide steps were extracted from trajectories carried out with either Parmbsc0<sub>OLIO</sub> (left, blue) or CHARMM36 (right, red) force fields on Oligo 4. BII% were calculated for the beginning (-from 50 to 150ns, first bar) and the end (from 900 to 1000ns, second bar) of the trajectories, 100ns of MDs. The first 50ns are not considered in this analysis. To help identification of the facing steps, sequence in Strand 1 is shown from 5' to 3', while sequence in Strand 2 is shown from 3' to 5'.

**From: Simulations meet experiment to reveal new insights into DNA intrinsic mechanics**

Akli Ben Imeddourene, Ahmad Elbahnsi, Marc Guérout, Christophe Oguey, Nicolas Foloppe, and Brigitte Hartmann
