# Supplementary material for: Simulations Meet Experiment to Reveal New Insights into DNA Intrinsic Mechanics
Source: PubMed Central journal article supplement (PMC4689557; doi:10.1371/journal.pcbi.1004631), 2015-12-10
Supplement: pcbi.1004631.s005.pdf [file pcbi.1004631.s005.pdf]

**S5 Fig.** ( $\epsilon-\zeta$ ) distribution in X-ray structures.

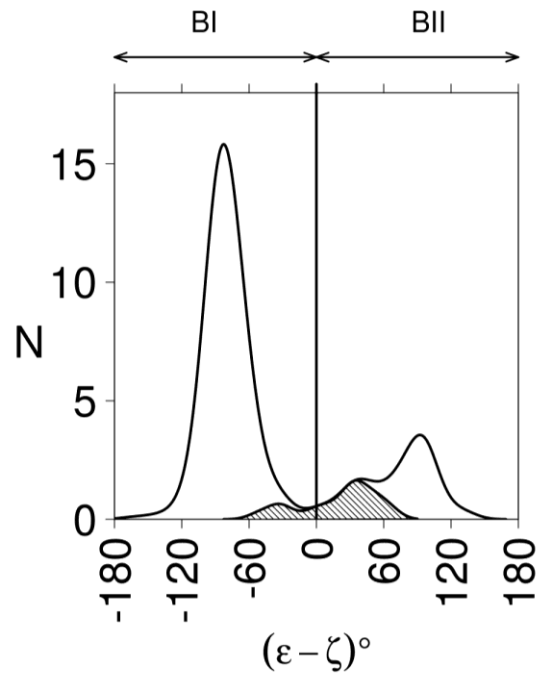

The frequencies ( $N$ ) of  $(\epsilon - \zeta)$  values ( $^\circ$ ) were extracted from 431 steps of high resolution X-ray structures of free DNA. The hachured region corresponds to the distribution of  $\epsilon/\zeta$ :*trans/trans*.

**From: Simulations meet experiment to reveal new insights into DNA intrinsic mechanics**

Akli Ben Imeddourene, Ahmad Elbahnsi, Marc Gu eroult, Christophe Oguey, Nicolas Foloppe, and Brigitte Hartmann
