# Supplementary material for: Simulations Meet Experiment to Reveal New Insights into DNA Intrinsic Mechanics
Source: PubMed Central journal article supplement (PMC4689557; doi:10.1371/journal.pcbi.1004631), 2015-12-10
Supplement: pcbi.1004631.s007.pdf [file pcbi.1004631.s007.pdf]

**S7 Fig.** Comparison between simulated and experimental BII percentages.

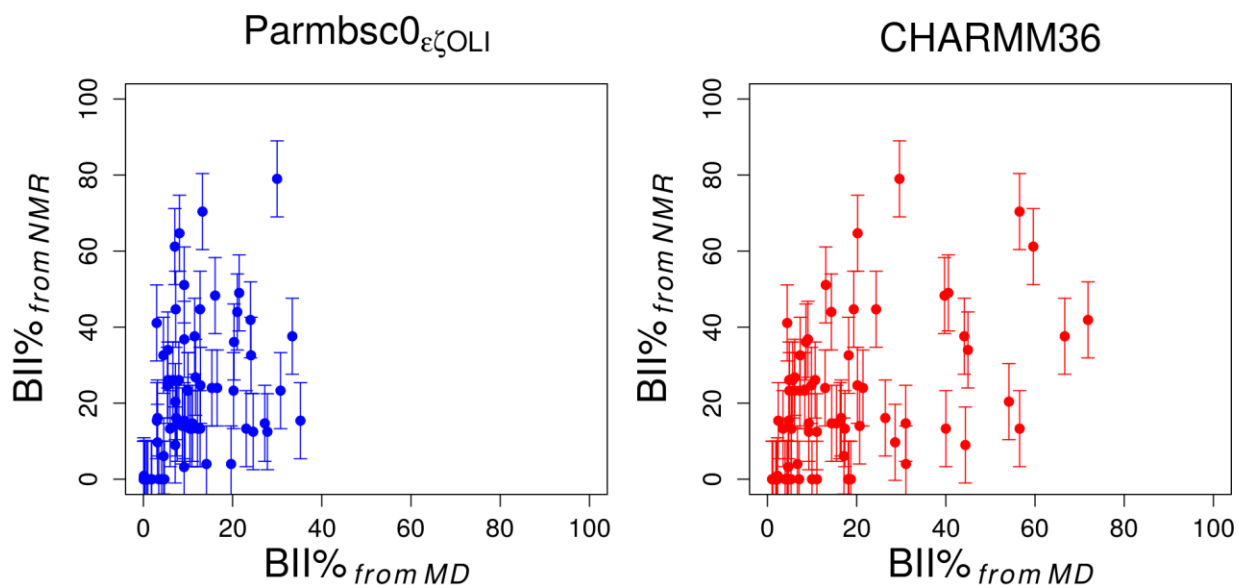

BII percentages were extracted from MDs ( $BII\%_{from\ MD}$ ) with Parmbsc0<sub>εζOLI</sub> (left panels, blue points) or CHARMM36 (right panels, red points) and compared with the corresponding values inferred from  $\delta$ Ps ( $BII\%_{from\ NMR}$ ). The vertical bars represent the error on  $BII\%_{from\ NMR}$ . The correlation coefficients are given in Table 2 (text section “Sequence-dependent BII propensities from simulations versus NMR.”).

**From: Simulations meet experiment to reveal new insights into DNA intrinsic mechanics**

Akli Ben Imeddourene, Ahmad Elbahnsi, Marc Gu eroult, Christophe Oguey, Nicolas Foloppe, and Brigitte Hartmann
