# Supplementary material for: Simulations Meet Experiment to Reveal New Insights into DNA Intrinsic Mechanics
Source: PubMed Central journal article supplement (PMC4689557; doi:10.1371/journal.pcbi.1004631), 2015-12-10
Supplement: pcbi.1004631.s010.pdf [file pcbi.1004631.s010.pdf]

**S1 Table.** BII percentages from NMR and simulations with Parmbsc0<sub>εCOLI</sub> and CHARMM36.

|                | Strand 1 | BII% <sub>from</sub> | BII% <sub>from</sub> | BII% <sub>from</sub> | Strand 2 | BII% <sub>from</sub> | BII% <sub>from</sub> | BII% <sub>from</sub> |
|----------------|----------|----------------------|----------------------|----------------------|----------|----------------------|----------------------|----------------------|
|                |          | <i>NMR</i>           | <i>P-MD</i>          | <i>C-MD</i>          |          | <i>NMR</i>           | <i>P-MD</i>          | <i>C-MD</i>          |
| <b>Oligo 1</b> | C2pG3    | 79                   | 30                   | 30                   | C22pG23  | 42                   | 23                   | 75                   |
|                | G3pT4    | 0                    | 4                    | 19                   | A21pC22  | 23                   | 17                   | 6                    |
|                | T4pA5    | 9                    | 7                    | 46                   | T20pA21  | 25                   | 14                   | 20                   |
|                | A5pG6    | 23                   | 31                   | 7                    | C19pT20  | 0                    | 3                    | 6                    |
|                | G6pC7    | 26                   | 8                    | 6                    | G18pC19  | 44                   | 21                   | 14                   |
|                | C7pA8    | 16                   | 7                    | 16                   | T17pG18  | 26                   | 10                   | 5                    |
|                | A8pA9    | 13                   | 24                   | 10                   | T16pT17  | 0                    | 1                    | 1                    |
|                | A9pG10   | 23                   | 20                   | 5                    | C15pT16  | 0                    | 1                    | 1                    |
|                | G10pC11  | 41                   | 3                    | 4                    | G14pC15  | 25                   | 11                   | 10                   |
| <b>Oligo 2</b> | C2pT3    | 0                    | 0                    | 6                    | A22pG23  | 15                   | 14                   | 2                    |
|                | T3pC4    | 15                   | 3                    | 5                    | G21pA22  | 48                   | 20                   | 40                   |
|                | C4pT5    | 0                    | 1                    | 5                    | A20pG21  | 15                   | 38                   | 17                   |
|                | T5pA6    | 15                   | 11                   | 33                   | T19pA20  | 14                   | 10                   | 20                   |
|                | A6pG7    | 13                   | 28                   | 9                    | C18pT19  | 0                    | 0                    | 4                    |
|                | G7pC8    | 37                   | 9                    | 10                   | G17pC18  | 36                   | 21                   | 8                    |
|                | C8pA9    | 15                   | 9                    | 14                   | T16pG17  | 6                    | 10                   | 13                   |
|                | A9pC10   | 4                    | 14                   | 6                    | G15pT16  | 0                    | 1                    | 8                    |
|                | C10pC11  | 34                   | 6                    | 43                   | G14pG15  | 70                   | 43                   | 57                   |
| <b>Oligo 3</b> | C2pG3    | 61                   | 7                    | 59                   | C22pG23  | 33                   | 3                    | 17                   |
|                | G3pC4    | 33                   | 24                   | 7                    | G21pC22  | 26                   | 5                    | 11                   |
|                | C4pT5    | 1                    | 0                    | 2                    | A20pG21  | 23                   | 11                   | 8                    |
|                | T5pT6    | 0                    | 0                    | 2                    | A19pA20  | 24                   | 21                   | 20                   |
|                | T6pA7    | 16                   | 3                    | 25                   | T18pA19  | 10                   | 3                    | 29                   |
|                | A7pA8    | 4                    | 20                   | 31                   | T17pT18  | 0                    | 0                    | 3                    |
|                | A8pA9    | 24                   | 16                   | 13                   | T16pT17  | 0                    | 0                    | 2                    |
|                | A9pC10   | 13                   | 6                    | 4                    | G15pT16  | 0                    | 4                    | 11                   |
|                | C10pG11  | 20                   | 7                    | 53                   | C14pG15  | 65                   | 10                   | 20                   |
| <b>Oligo 4</b> | G2pC3    | 15                   | 8                    | 17                   | G22pC23  | 15                   | 24                   | 9                    |
|                | C3pA4    | 45                   | 13                   | 24                   | T21pG22  | 51                   | 11                   | 15                   |
|                | A4pC5    | 3                    | 9                    | 6                    | G20pT21  | 0                    | 2                    | 8                    |
|                | C5pG6    | 49                   | 21                   | 40                   | C19pG20  | 13                   | 30                   | 55                   |
|                | G6pT7    | 0                    | 2                    | 19                   | A18pC19  | 13                   | 12                   | 6                    |
|                | T7pA8    | 13                   | 12                   | 38                   | T17pA18  | 38                   | 14                   | 45                   |
|                | A8pC9    | 13                   | 10                   | 5                    | G16pT17  | 0                    | 5                    | 19                   |
|                | C9pG10   | 38                   | 33                   | 67                   | C15pG16  | 13                   | 15                   | 18                   |
|                | G10pC11  | 27                   | 12                   | 7                    | G14pC15  | 45                   | 7                    | 18                   |

The BII percentages of the individual phosphates were inferred from  $\delta$ Ps (BII%<sub>from NMR</sub>, with a tolerance of  $\pm 10\%$ ) or extracted from the simulations carried out with Parmbsc0<sub>εCOLI</sub> (BII%<sub>from P-MD</sub>) or CHARMM36 (BII%<sub>from C-MD</sub>).

**From: Simulations meet experiment to reveal new insights into DNA intrinsic mechanics**

Akli Ben Imeddourene, Ahmad Elbahnsi, Marc Gu eroult, Christophe Oguey, Nicolas Foloppe, and Brigitte Hartmann
