# Supplementary material for: Simulations Meet Experiment to Reveal New Insights into DNA Intrinsic Mechanics
Source: PubMed Central journal article supplement (PMC4689557; doi:10.1371/journal.pcbi.1004631), 2015-12-10
Supplement: pcbi.1004631.s011.pdf [file pcbi.1004631.s011.pdf]

**S2 Table.** Populations of the three conformational combinations of facing phosphate groups based on experimental data.

|                |                 | BI•BI% | BI•BII BI•BII% | BII•BII% |
|----------------|-----------------|--------|----------------|----------|
| <b>Oligo 1</b> | C2pG3•C22pG23   | 12     | 55             | 33       |
|                | G3pT4•A21pC22   | 77     | 23             | 0        |
|                | T4pA5•T20pA21   | 69     | 29             | 2        |
|                | A5pG6•C19pT20   | 77     | 23             | 0        |
|                | G6pC7•G18pC19   | 41     | 47             | 11       |
|                | C7pA8•T17pG18   | 62     | 34             | 4        |
|                | A8pA9•T16pT17   | 88     | 13             | 0        |
|                | A9pG10•C15pT16  | 77     | 23             | 0        |
|                | G10pC11•G14pC15 | 44     | 45             | 10       |
| <b>Oligo 2</b> | C2pT3•A22pG23   | 85     | 15             | 0        |
|                | T3pC4•G21pA22   | 44     | 49             | 7        |
|                | C4pT5•A20pG21   | 84     | 16             | 0        |
|                | T5pA6•T19pA20   | 73     | 25             | 2        |
|                | A6pG7•C18pT19   | 88     | 13             | 0        |
|                | G7pC8•G17pC18   | 40     | 46             | 13       |
|                | C8pA9•T16pG17   | 80     | 19             | 1        |
|                | A9pC10•G15pT16  | 96     | 4              | 0        |
|                | C10pC11•G14pG15 | 20     | 57             | 24       |
| <b>Oligo 3</b> | C2pG3•C22pG23   | 26     | 54             | 20       |
|                | G3pC4•G21pC22   | 49     | 42             | 9        |
|                | C4pT5•A20pG21   | 76     | 24             | 0        |
|                | T5pT6•A19pA20   | 76     | 24             | 0        |
|                | T6pA7•T18pA19   | 76     | 23             | 2        |
|                | A7pA8•T17pT18   | 96     | 4              | 0        |
|                | A8pA9•T16pT17   | 76     | 24             | 0        |
|                | A9pC10•G15pT16  | 87     | 13             | 0        |
|                | C10pG11•C14pG15 | 28     | 59             | 13       |
| <b>Oligo 4</b> | G2pC3•G22pC23   | 73     | 25             | 2        |
|                | C3pA4•T21pG22   | 27     | 50             | 23       |
|                | A4pC5•G20pT21   | 97     | 3              | 0        |
|                | C5pG6•C19pG20   | 44     | 49             | 7        |
|                | G6pT7•A18pC19   | 87     | 13             | 0        |
|                | T7pA8•T17pA18   | 54     | 41             | 5        |
|                | A8pC9•G16pT17   | 87     | 13             | 0        |
|                | C9pG10•C15pG16  | 54     | 41             | 5        |

The percentages of the BII•BII, BI•BII|BII•BI and BII•BII combinations were calculated for the four dodecamers from the BII percentages of individual phosphates,  $BII\%_{from\ NMR}$ , (see S1 Table) using the equations (2) and (3) given in the text section “New insights from the simulations: independence of the states of facing phosphate groups.”.

**From: Simulations meet experiment to reveal new insights into DNA intrinsic mechanics**

Akli Ben Imeddourene, Ahmad Elbahnsi, Marc Gu eroult, Christophe Oguey, Nicolas Foloppe, and Brigitte Hartmann
